# Supplementary material for: Cultural Adaptation and Validation of the International Hip Outcome Tool-33 for Arabic-Speaking Populations With Hip-Related Pathologies
Source: Research Square preprint supplement (doi:10.21203/rs.3.rs-8627634/v1), 2026-02-09
Supplement: Supplementary file 1 [file 20308a588c6d1c86a87232b0.docx]

| **Variables** | **iHOT-33 Total Score** | **WOMAC - Pain** | **WOMAC Stiffness** | **WOMAC - Difficulties** | **Total WOMAC Score** |
| --- | --- | --- | --- | --- | --- |
| **iHOT-33 Total Score** | 1 | -0.597 | -0.527 | -0.584 | -0.608 |
| **WOMAC - Pain** | -0.597 | 1 | 0.708 | 0.853 | 0.910 |
| **WOMAC Stiffness** | -0.527 | 0.708 | 1 | 0.744 | 0.792 |
| **WOMAC - Difficulties** | -0.584 | 0.853 | 0.744 | 1 | 0.989 |
| **Total WOMAC Score** | -0.608 | 0.910 | 0.792 | 0.989 | 1 |

**Table 3.** **Spearman** **Correlation matrix**
