# Supplementary material for: Cultural Adaptation and Validation of the International Hip Outcome Tool-33 for Arabic-Speaking Populations With Hip-Related Pathologies
Source: Research Square preprint supplement (doi:10.21203/rs.3.rs-8627634/v1), 2026-02-09
Supplement: Supplementary file 2 [file 7ddc10adc9843e83ea30edce.docx]

**(IHOT-33) أداة قياس نتائج الورك الدولية**

**استبيان جودة الحياة للمرضى النشطين والشباب الذين يعانون من مشاكل في الورك**

| **التعليمات:**  - هذه الأسئلة تسألك عن المشاكل التي قد تواجهها في الورك، وكيف تؤثر هذه المشاكل على حياتك، والمشاعر التي قد تشعر بها بسبب هذه المشاكل.  - يرجى الإجابة على كل سؤال فيما يتعلق بالحالة الحالية، الوظيفة، الظروف، والمعتقدات المتعلقة بالورك.  - فكر في **الشهر** الماضي.  - الأسئلة مُصممة بحيث يمكنك تحديد شدة المشكلة عن طريق دائرة الرقم تحت السؤال. |
| --- |
| **ملاحظة:**  يرجى وضع دائرة حول الرقم الذي يمثل حالتك بدقة.  **-** إذا وضعت دائرة حول رقم على **اليمين**، فهذا يعني أنك تشعر بأنك **تعاني من إعاقة كبيرة**. على سبيل المثال:  **10-------9------8------7------6------5------4------3------2-----1------0**  **إعاقة كبيرة لا مشاكل على الإطلاق**  **-** إذا وضعت دائرة حول رقم على **اليسار**، فهذا يعني أنك **لا تشعر بأي مشاكل في الورك**. على سبيل المثال:  **10-------9------8------7------6------5------4------3------2-----1------0**  **إعاقة كبيرة لا مشاكل على الإطلاق**  إذا وضعت دائرة حول رقم في منتصف الخط، فهذا يعني أنك تعاني من إعاقة معتدلة، أو بعبارة أخرى، بين أقصى حالات "الإعاقة الكبيرة" و"لا مشاكل على الإطلاق". من المهم وضع دائرة حول الرقم المناسب في نهاية الخط إذا كانت الوصف المتطرف يعكس حالتك بدقة.  إذا كان السؤال يسأل عن شيء لا تواجهه، يرجى تحديد الخيار:  **لا أفعل هذا الإجراء في أنشطتي،** حيثما كان ذلك مناسبًا**🗹** |
| **: الأعراض والقيود الوظيفية -I**  الأسئلة التالية تسألك عن الأعراض التي قد تشعر بها في **الورك** وعن وظيفة **الورك** فيما يتعلق بالأنشطة اليومية. يرجى التفكير في كيف شعرت في معظم الأوقات خلال **الشهر** الماضي والإجابة وفقًا لذلك. |
| **1- كم مرة يشعر وركك/فخذك بالألم؟**  **10-------9------8------7------6------5------4------3------2-----1------0**  **دائمًا أبدًا** |
| **2- كم هو تيبّس الورك نتيجة الجلوس/الراحة خلال اليوم؟**  **10-------9------8------7------6------5------4------3------2-----1------0**  **تيبّس شديد لا تيبّس على الإطلاق** |
| **3- ما مدى صعوبة المشي لمسافات طويلة؟**  **10-------9------8------7------6------5------4------3------2-----1------0**  **صعوبة شديدة لا صعوبة على الإطلاق** |
| **4- كم هو مقدار الألم الذي تشعر به في الورك أثناء الجلوس؟**  **10-------9------8------7------6------5------4------3------2-----1------0**  **ألم شديد لا ألم على الإطلاق** |
| **5- كم هو مقدار المشاكل التي تواجهها في الوقوف لفترات طويلة؟**  **10-------9------8------7------6------5------4------3------2-----1------0**  **مشاكل شديدة لا مشاكل على الإطلاق** |
| **6- ما مدى صعوبة النهوض والجلوس من على الأرض؟**  **10-------9------8------7------6------5------4------3------2-----1------0**  **صعوبة شديدة لا صعوبة على الإطلاق** |
| **7- ما مدى صعوبة المشي على الأسطح غير المستوية؟**  **10-------9------8------7------6------5------4------3------2-----1------0**  **صعوبة شديدة لا صعوبة على الإطلاق** |
| **8- ما مدى صعوبة الاستلقاء على الجانب المصاب من الورك؟**  **10-------9------8------7------6------5------4------3------2-----1------0**  **صعوبة شديدة لا صعوبة على الإطلاق** |
| **9- كم هو مقدار المشاكل التي تواجهها في تخطي العوائق؟**  **10-------9------8------7------6------5------4------3------2-----1------0**  **مشاكل شديدة لا مشاكل على الإطلاق** |
| **10- كم هو مقدار المشاكل التي تواجهها في الصعود والنزول على السلالم؟**  **10-------9------8------7------6------5------4------3------2-----1------0**  **مشاكل شديدة لا مشاكل على الإطلاق** |
| **11- كم هو مقدار المشاكل التي تواجهها في النهوض من وضعية الجلوس؟**  **10-------9------8------7------6------5------4------3------2-----1------0**  **مشاكل شديدة لا مشاكل على الإطلاق** |
| **12- كم هو مقدار الانزعاج الذي تشعر به عند اتخاذ خطوات طويلة؟**  **10-------9------8------7------6------5------4------3------2-----1------0**  **انزعاج شديد لا انزعاج على الإطلاق** |
| **13- كم هو مقدار الصعوبة التي تواجهها في الدخول والخروج من السيارة؟**  **10-------9------8------7------6------5------4------3------2-----1------0**  **صعوبة شديدة لا صعوبة على الإطلاق** |
| **14- كم هو مقدار المشاكل التي تواجهها من الطحن، النقر، أو الإنكماش في وركك؟**  **10-------9------8------7------6------5------4------3------2-----1------0**  **مشاكل شديدة لا مشاكل على الإطلاق** |
| **15- كم هو مقدار الصعوبة التي تواجهها في ارتداء/خلع الجوارب، الجوارب، أو الأحذية؟**  **10-------9------8------7------6------5------4------3------2-----1------0**  **صعوبة شديدة لا صعوبة على الإطلاق** |
| **16- بشكل عام، كم مقدار الألم الذي تشعر به في الورك/الأربية؟**  **10-------9------8------7------6------5------4------3------2-----1------0**  **دائمًا أبدًا** |
| **: الأنشطة الرياضية والترفيهية -II**  الأسئلة التالية تسألك عن **وركك** عند المشاركة في الأنشطة الرياضية والترفيهية. يرجى التفكير في كيف شعرت في معظم الأوقات خلال **الشهر** الماضي والإجابة وفقًا لذلك. |
| **17- ما مدى قلقك بشأن قدرتك على الحفاظ على مستوى اللياقة البدنية المطلوب؟**  **10-------9------8------7------6------5------4------3------2-----1------0**  **قلق شديد لا قلق على الإطلاق** |
| **18- كم هو مقدار الألم الذي تشعر به في وركك بعد النشاط؟**  **10-------9------8------7------6------5------4------3------2-----1------0**  **ألم شديد لا ألم على الإطلاق** |
| **19- كم هو مقدار قلقك من أن يزيد الألم في وركك إذا شاركت في الأنشطة الرياضية أو الترفيهية؟**  **10-------9------8------7------6------5------4------3------2-----1------0**  **قلق شديد لا قلق على الإطلاق** |
| **20- كم تدهورت جودة حياتك لأنك لا تستطيع المشاركة في الأنشطة الرياضية أو الترفيهية؟**  **10-------9------8------7------6------5------4------3------2-----1------0**  **تدهور شديد لا تدهور على الإطلاق** |
| **21- ما مدى قلقك بشأن تغيير الاتجاهات أثناء الأنشطة الرياضية أو الترفيهية؟**  لا أفعل هذا الإجراء في أنشطتي.**🞏**  **10-------9------8------7------6------5------4------3------2-----1------0**  **قلق شديد لا قلق على الإطلاق** |
| **22- كم انخفض مستوى أدائك في الأنشطة الرياضية أو الترفيهية؟**  **10-------9------8------7------6------5------4------3------2-----1------0**  **انخفاض شديد لا انخفاض على الإطلاق** |
| **: القلقات المتعلقة بالعمل -III**  الأسئلة التالية تتعلق **بوركك** فيما يتعلق بأنشطتك العملية أو المهنية. يرجى التفكير في كيف شعرت في معظم الأوقات خلال **الشهر** الماضي والإجابة وفقًا لذلك. |
| **أنا متقاعد** (يرجى تخطي هذا القسم) **🞏**  **لا أعمل لأسباب أخرى غير حالتي في الورك** (يرجى تخطي هذا القسم)**🞏** |
| **23- كم هو مقدار المشاكل التي تواجهها في دفع، سحب، رفع، أو حمل الأشياء الثقيلة في العمل؟**  لا أفعل هذه الإجراءات في عملي. **🞏**  **10-------9------8------7------6------5------4------3------2-----1------0**  **مشاكل شديدة لا مشاكل على الإطلاق** |
| **24- كم هو مقدار المشاكل التي تواجهها في الجثو/القرفصاء؟**  **10-------9------8------7------6------5------4------3------2-----1------0**  **مشاكل شديدة لا مشاكل على الإطلاق** |
| **25- كم هو مقدار قلقك من أن يزيد عملك من سوء حالتك في الورك؟**  **10-------9------8------7------6------5------4------3------2-----1------0**  **قلق شديد لا قلق على الإطلاق** |
| **26- كم هو مقدار المشاكل التي تواجهها في العمل بسبب قلة حركة الورك؟**  **10-------9------8------7------6------5------4------3------2-----1------0**  **صعوبة شديدة لا صعوبة على الإطلاق** |
| **: قلق اجتماعي وعاطفي وحول نمط الحياة -IV**  الأسئلة التالية تسألك عن القلقات الاجتماعية والعاطفية ونمط الحياة التي قد تشعر بها فيما يتعلق بمشكلة **الورك**. يرجى التفكير في كيف شعرت في معظم الأوقات خلال **الشهر** الماضي والإجابة وفقًا لذلك. |
| **27- كم تشعر بالإحباط بسبب مشكلة الورك؟**  **10-------9------8------7------6------5------4------3------2-----1------0**  **إحباط شديد لا إحباط على الإطلاق** |
| **28- كم هو مقدار المشاكل التي تواجهها في النشاط الجنسي بسبب وركك؟**  هذا ليس ذا صلة بي.**🞏**  **10-------9------8------7------6------5------4------3------2-----1------0**  **مشاكل شديدة لا مشاكل على الإطلاق** |
| **29- كم هو مقدار الإلهاء الذي تسببه لك مشكلة الورك؟**  **10-------9------8------7------6------5------4------3------2-----1------0**  **إلهاء شديد لا إلهاء على الإطلاق** |
| **30- كم هو مقدار الصعوبة التي تواجهها في التخلص من التوتر والضغط بسبب مشكلة الورك؟**  **10-------9------8------7------6------5------4------3------2-----1------0**  **صعوبة شديدة لا صعوبة على الإطلاق** |
| **31- كم تشعر بالإحباط بسبب مشكلة الورك؟**  **10-------9------8------7------6------5------4------3------2-----1------0**  **إحباط شديد لا إحباط على الإطلاق** |
| **32- كم هو مقدار القلق الذي تشعر به عند التقاط أو حمل الأطفال بسبب وركك؟**  لا أفعل هذا الإجراء في أنشطتي.**🞏**  **10-------9------8------7------6------5------4------3------2-----1------0**  **قلق شديد لا قلق على الإطلاق** |
| **33- كم من الوقت تكون مدركًا للإعاقة في وركك؟**  **10-------9------8------7------6------5------4------3------2-----1------0**  **مدرك دائمًا غير مدرك على الإطلاق** |
| **إكتمل الاستبيان! شكرًا لك!** |
