# Supplementary material for: Cultural Adaptation and Validation of the International Hip Outcome Tool-33 for Arabic-Speaking Populations With Hip-Related Pathologies
Source: Research Square preprint supplement (doi:10.21203/rs.3.rs-8627634/v1), 2026-02-09
Supplement: Supplementary file 3 [file a7793fafb847f01113a5db12.docx]

|  | **F1** | **F2** | **F3** |
| --- | --- | --- | --- |
| How much stiffness do you experience in your hip after sitting or resting during the day | 0.310 | 0.346 | 0.356 |
| How much difficulty do you have walking long distances | 0.617 | -0.050 | 0.372 |
| How much pain do you experience in your hip while sitting | 0.434 | 0.384 | -0.116 |
| How much difficulty do you have standing for long periods of time | 0.689 | 0.001 | -0.053 |
| How much difficulty do you have getting up from or down to the floor | 0.681 | -0.443 | 0.076 |
| How much difficulty do you have walking on uneven surfaces | 0.760 | -0.160 | 0.031 |
| How much difficulty do you have lying on your painful side | 0.682 | 0.151 | 0.014 |
| How much difficulty do you have spreading your legs apart | 0.761 | 0.239 | 0.136 |
| How much difficulty do you have going up and down stairs | 0.671 | -0.074 | 0.449 |
| How much difficulty do you have getting up from a sitting position | 0.717 | 0.113 | 0.231 |
| How much discomfort do you have when taking long strides | 0.763 | -0.136 | 0.324 |
| How much difficulty do you have getting in and out of a car | 0.695 | 0.266 | 0.244 |
| How much trouble do you have with catching, clicking, or locking in your hip | 0.258 | 0.671 | 0.164 |
| How much difficulty do you have putting on or taking off socks or shoes | 0.476 | 0.279 | 0.504 |
| How concerned are you about your ability to maintain your desired level of fitness | 0.772 | -0.193 | -0.002 |
| How much pain do you experience in your hip after activity | 0.788 | -0.123 | -0.038 |
| How concerned are you that participating in sport or recreational activities will increase your hip pain | 0.823 | -0.128 | -0.032 |
| How much has your ability to participate in sport or recreational activities decreased since your hip problem began | 0.859 | -0.044 | -0.122 |
| How concerned are you about your hip affecting your sport or recreational activities | 0.840 | -0.040 | -0.085 |
| How much has your level of performance in sport or recreational activities decreased | 0.802 | -0.110 | -0.022 |
| How much difficulty do you have pushing, pulling, lifting, or carrying heavy objects at work | 0.683 | -0.244 | 0.076 |
| How much difficulty do you have sitting or standing at work | 0.625 | -0.417 | 0.209 |
| How concerned are you that your work is making your hip problem worse | 0.765 | -0.175 | -0.336 |
| How much difficulty do you have at work because of limited hip movement | 0.831 | -0.119 | -0.155 |
| How frustrated are you because of your hip problem | 0.705 | 0.236 | -0.417 |
| How much difficulty do you have with sexual activity because of your hip | 0.653 | 0.162 | -0.155 |
| How much does your hip problem distract you | 0.566 | 0.508 | -0.308 |
| How much difficulty do you have relaxing or relieving stress because of your hip problem | 0.769 | 0.282 | -0.279 |
| How concerned are you about picking up or carrying children because of your hip | 0.805 | -0.046 | -0.180 |
| How long have you been experiencing disability related to your hip | 0.732 | -0.125 | -0.303 |

**Table 2.** **Factor Loadings**
