# Supplementary material for: Cultural Adaptation and Validation of the International Hip Outcome Tool-33 for Arabic-Speaking Populations With Hip-Related Pathologies
Source: Research Square preprint supplement (doi:10.21203/rs.3.rs-8627634/v1), 2026-02-09
Supplement: Supplementary file 4 [file b21f746d6d8546d24e7acbb2.docx]

|  | **iHOT-33** | **WOMAC - Pain** | **WOMAC - Stiffness** | **WOMAC - Difficulties** | **Total WOMAC Score** |
| --- | --- | --- | --- | --- | --- |
| **Floor (%)** | 0% | 4% | 11% | 2% | 1% |
| **Ceiling (%)** | 0% | 3% | 5% | 2% | 2% |
| **Median** | 31.82 | 10.00 | 4.000 | 32.50 | 45.50 |
| **Mean** | 34.86 | 9.680 | 3.680 | 33.43 | 46.79 |
| **Standard Deviation** | 19.04 | 5.011 | 2.229 | 16.72 | 22.92 |
| **p-value of Shapiro-Wilk** | 0.029 | 0.168 | < .001 | 0.182 | 0.247 |
| **Minimum** | 0.000 | 0.000 | 0.000 | 0.000 | 0.000 |
| **Maximum** | 100 | 20.00 | 8.000 | 68.00 | 96.00 |
| **25th percentile** | 20.83 | 6.000 | 2.000 | 21.00 | 29.00 |
| **75th percentile** | 46.14 | 13.00 | 6.000 | 46.25 | 65.00 |

**Table 1.** **Descriptive statistics, floor/ceiling effects, and normality (Shapiro–Wilk) for IHOT-33-AR (Total and subscales) and WOMAC-AR**
